# Supplementary material for: Carrier-free co-immobilization of xylanase, cellulase and β-1,3-glucanase as combined cross-linked enzyme aggregates (combi-CLEAs) for one-pot saccharification of sugarcane bagasse
Source: Royal Society of Chemistry journal article supplement (doi:10.1039/c6ra00929h), 2016-01-01
Supplement: c6ra00929h1.pdf [file c6ra00929h1.pdf]

Table S1. Thermal stability of xylanase, cellulase and  $\beta$ -1,3-glucanase in combi-CLEAs and free enzymes at 30°C, 40°C, 50°C, 60°C and 70°C after 2, 4 and 8 h of incubation.

| Enzyme                                | Time (h) | Residual activity (%) |        |          |          |          |
|---------------------------------------|----------|-----------------------|--------|----------|----------|----------|
|                                       |          | 30°C                  | 40°C   | 50°C     | 60°C     | 70°C     |
| Free xylanase                         | 2        | 61±1.8                | 74±2.2 | 78 ± 2.3 | 65 ± 2.0 | 35 ± 1.1 |
|                                       | 4        | 54±1.6                | 47±1.4 | 56±1.7   | 23±0.7   | 16±0.5   |
|                                       | 8        | 45±1.4                | 29±0.9 | 24±0.7   | 7±0.2    | 1±0.03   |
| Free cellulase                        | 2        | 59±1.7                | 70±2.1 | 72 ± 2.2 | 61 ± 1.8 | 47 ± 1.4 |
|                                       | 4        | 51±1.5                | 41±1.2 | 60±1.8   | 27±0.8   | 9.0±0.3  |
|                                       | 8        | 42±1.3                | 32±0.9 | 23±0.7   | 5±0.2    | 1±0.03   |
| Free $\beta$ -1,3-glucanase           | 2        | 53±1.6                | 63±1.9 | 65 ± 2.0 | 60 ± 2.8 | 37 ± 1.1 |
|                                       | 4        | 52±1.6                | 44±1.3 | 63±1.9   | 20±0.6   | 15±0.5   |
|                                       | 8        | 40±1.2                | 30±0.9 | 20±0.6   | 9±0.3    | 1±0.03   |
| Xylanase in combi-CLEAs               | 2        | 63±1.9                | 92±2.8 | 96 ± 2.9 | 89 ± 2.7 | 80± 2.4  |
|                                       | 4        | 59±1.8                | 68±2.0 | 74±2.2   | 36±1.1   | 27±0.8   |
|                                       | 8        | 49±1.5                | 43±1.3 | 38±1.1   | 12±0.4   | 3±0.09   |
| Cellulase in combi-CLEAs              | 2        | 72±2.2                | 91±2.7 | 97 ± 2.9 | 90 ± 2.7 | 79 ± 2.4 |
|                                       | 4        | 65±2.0                | 61±2.1 | 71±2.1   | 31±0.9   | 22±0.7   |
|                                       | 8        | 55±1.7                | 40±1.2 | 41±1.2   | 10±0.3   | 4±0.12   |
| $\beta$ -1,3-glucanase in combi-CLEAs | 2        | 74±2.2                | 93±2.8 | 95 ± 2.9 | 88 ± 2.6 | 72 ± 2.4 |
|                                       | 4        | 67±2.0                | 60±2.1 | 69±2.1   | 34±1.0   | 24±0.7   |
|                                       | 8        | 57±1.7                | 39±1.2 | 34±1.0   | 14±0.4   | 2±0.06   |

Table.S2. Sugar concentrations of HPLC analysis of combi-CLEAs hydrolyzed SCB pulp

| Time (h) | Amount of sugar release in the hydrolysate (mg/L) |           |         |        |         |
|----------|---------------------------------------------------|-----------|---------|--------|---------|
|          | Arabinose                                         | Galactose | Glucose | Xylose | Mannose |
| 2        | 62                                                | 8         | 420     | 102    | 15      |
| 9        | 85                                                | 11        | 721     | 180    | 26      |
| 24       | 145                                               | 18        | 987     | 333    | 41      |
| 33       | 151                                               | 23        | 1254    | 923    | 157     |
| 48       | 182                                               | 31        | 2021    | 1012   | 147     |
| 57       | 185                                               | 32        | 2023    | 1015   | 150     |
